# Supplementary material for: Investigating machine learning models to predict microbial activity during ozonation–biofiltration
Source: Royal Society of Chemistry journal article supplement (doi:10.1039/d2ew00747a), 2022-12-09
Supplement: d2ew00747a1.pdf [file d2ew00747a1.pdf]

## Electronic Supplementary Information

### Supplementary material A

Figure S1 shows the effect of number of features on prediction accuracy.

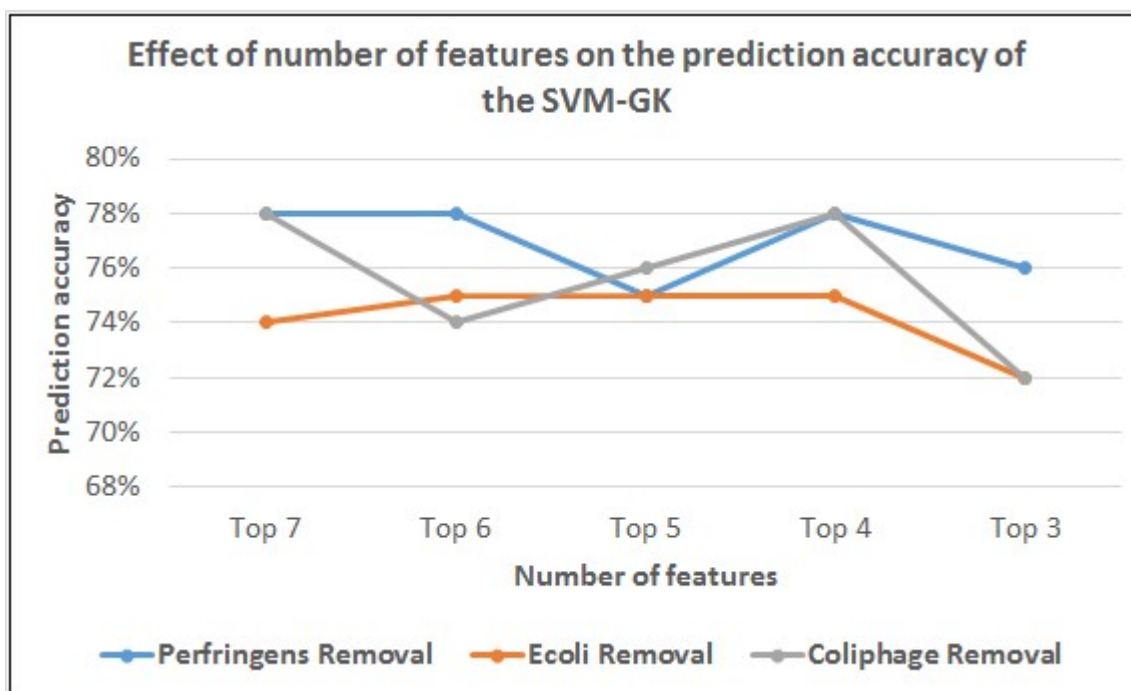

Figure S1, Effect of number of features on prediction accuracy.

### Supplementary material B

Figure S2 shows the confusion matrix for the 4 class prediction. The number of true positives (TP), true negatives (TN), false positives (FP), and false negatives (FN) for each of the 4 classes are calculated as follows:

$$TP(i) = c\_matrix(i,i);$$

$$FN(i) = \text{sum}(c\_matrix(i,:)) - c\_matrix(i,i);$$

$$FP(i) = \text{sum}(c\_matrix(:,i)) - c\_matrix(i,i);$$

$$TN(i) = \text{sum}(c\_matrix(:)) - TP(i) - FP(i) - FN(i);$$

where, *c\_matrix* denotes the confusion matrix and *i* denotes the class number (i.e., 1, 2, 3, or 4). The first element inside the brackets (e.g., *i*<sub>1</sub> in *c\_matrix*(*i*<sub>1</sub>,*i*<sub>2</sub>)) indicates the row number or the true class number in the confusion matrix and the second element inside the brackets (e.g., *i*<sub>2</sub> in *c\_matrix*(*i*<sub>1</sub>,*i*<sub>2</sub>)) means the column number or the predicted class number in the confusion matrix.

|                   |          |                        |          |          |          |
|-------------------|----------|------------------------|----------|----------|----------|
| <b>True class</b> | <b>1</b> |                        |          |          |          |
|                   | <b>2</b> |                        |          |          |          |
|                   | <b>3</b> |                        |          |          |          |
|                   | <b>4</b> |                        |          |          |          |
|                   |          | <b>1</b>               | <b>2</b> | <b>3</b> | <b>4</b> |
|                   |          | <b>Predicted class</b> |          |          |          |

Figure S2, Confusion matrix in 4 class prediction.

Subsequently, prediction accuracy (PA), prediction error (PE), true positive rate, false positive rate, false negative rate, and true negative rate are calculated from the following equations:

$$PA = (TP+TN)/(TP+FN+FP+TN);$$

$$PE = 1 - \text{accuracy};$$

$$TP\_rate = TP/(TP+FN);$$

$$FP\_rate = FP/(FP+TN);$$

$$\text{FN\_rate} = \text{FN}/(\text{FN}+\text{TP});$$

$$\text{TN\_rate} = \text{TN}/(\text{TN}+\text{FP});$$

Cohen's kappa is defined as:

$$\kappa = \frac{p_{\text{predicted}} - p_{\text{true label}}}{1 - p_{\text{true label}}} = 1 - \frac{1 - p_{\text{predicted}}}{1 - p_{\text{true label}}}$$

where  $p_{\text{predicted}}$  is the observed agreement, and  $p_{\text{true label}}$  is the expected agreement.

To compute AUC, area under the receiver operating characteristic (ROC) curve for each of the 4 classes is computed and the mean of these values is taken as the overall AUC.

MATLAB's *perfcrv* function is utilized for this purpose.
